## **Rapid compensatory evolution can rescue low fitness symbioses following partner-switching**

Megan E S Sørensen<sup>1</sup>, A Jamie Wood<sup>2</sup>, Duncan D Cameron<sup>1</sup>, Michael A Brockhurst<sup>3\*</sup>

1. Department of Animal and Plant Sciences, University of Sheffield, Sheffield S10 2TN
2. Department of Biology, University of York, York YO10 5DD
3. Division of Evolution and Genomic Sciences, School of Biological Sciences, University of Manchester, Manchester M13 9PT

\*Corresponding author Michael A. Brockhurst.  
**Email:** michael.brockhurst@manchester.ac.uk

**Author Contributions:** M.A.B, D.D.C, and M.E.S.S conceived and designed the study. M.E.S.S conducted experimental work. M.E.S.S and D.D.C analysed the data. M.E.S.S and M.A.B drafted the manuscript. All authors commented on the manuscript.

**Competing Interest Statement:** The authors declare no conflict of interests.

**Classification:** Biological Sciences, Evolution

**Keywords:** Symbiosis, Experimental evolution, photosymbiosis, partner-switching

**This PDF file includes:**

Main Text  
Figures 1 to 4

## 1 **Abstract**

2 Partner-switching plays an important role in the evolution of symbiosis, enabling local  
3 adaptation and recovery from the breakdown of symbiosis. Because of intergenomic  
4 epistasis, partner-switched symbioses may possess novel combinations of phenotypes but  
5 may also exhibit low fitness due to their lack of recent coevolutionary history. Here, we  
6 examine the structure and mechanisms of intergenomic epistasis in the *Paramecium-*  
7 *Chlorella* symbiosis and test if compensatory evolution can rescue initially low fitness  
8 partner-switched symbioses. Using partner-switch experiments coupled with metabolomics  
9 we show evidence for intergenomic epistasis wherein low fitness arose from mismatched  
10 photoprotection traits and the resulting light stress experienced by non-native symbionts  
11 when in high light environments. Experimental evolution under high light conditions revealed  
12 that an initially low fitness partner-switched non-native host-symbiont pairing rapidly  
13 adapted, gaining fitness equivalent to the native host symbiont pairing in less than 50 host  
14 generations. Compensatory evolution took two alternative routes: Either, hosts evolved  
15 higher symbiont loads to mitigate for their new algal symbiont's poor performance, or the  
16 algal symbionts themselves evolved higher investment in photosynthesis and  
17 photoprotective traits to better mitigate light stress. These findings suggest that partner-  
18 switching combined with rapid compensatory evolution will enable the recovery and local  
19 adaptation of symbioses in response to changing environments.

20

## 21 **Significance statement**

22 Symbiosis enables the formation of new organisms through the merger of once independent  
23 species. Through symbiosis, species can acquire new functions, driving evolutionary  
24 innovation and underpinning important ecosystem processes. Symbioses that breakdown  
25 due to changing environmental conditions can reform by acquiring new symbionts in a  
26 process called partner-switching but may exhibit low fitness due to their lack of coadaptation.  
27 Using a microbial symbiosis between the single-celled eukaryote *Paramecium* and the green  
28 alga *Chlorella* we show that low fitness in partner-switched host-symbiont pairings arises

29 from mismatched photoprotection traits. However, such low fitness partner-switched pairings  
30 can be rapidly rescued by adaptive evolution, regaining high fitness in less than 50 host  
31 generations. Partner-switching coupled with rapid compensatory evolution can enable  
32 symbioses to recover from breakdown.

33

## 34 **Main Text**

### 35 **Introduction**

36 Beneficial symbioses have an inherent potential for conflict between the symbiotic partners.  
37 This can drive the breakdown of symbiosis if environmental conditions change the net  
38 benefit of interacting or if the pursuit of individual fitness favours cheating (1). Both situations  
39 can select for partner-switching to recombine novel symbiotic partnerships (2). Partner-  
40 switching can provide access to novel symbiotic phenotypes to overcome maladaptation to  
41 the prevailing environmental context (3) or restore symbiont function following breakdown (4,  
42 5). The generation of phenotypic novelty through partner-switching arises from intergenomic  
43 epistasis (6); that is, genetic variation for the outcome of symbiosis in the form of host  
44 genotype by symbiont genotype interactions ( $G^H \times G^S$ ) for symbiotic traits or fitness.  
45 Furthermore, the fitness effects of symbiosis are mediated by the environmental context (7),  
46 causing host-genotype-by-symbiont-genotype-by-environment interactions ( $G^H \times G^S \times E$ ). A  
47 consequence of  $G^H \times G^S \times E$  interactions is that there is unlikely to be an optimal host-  
48 symbiont pairing across all environments, further driving selection for partner-switching or  
49 dynamic coevolution of the symbiosis (8). As such, partner-switching can enable niche-  
50 expansion by hosts (9, 10) and provide a mechanism by which host local adaptation can  
51 arise faster than through adaptation of the current symbiont (11, 12).

52

53 Newly interacting partner-switched symbioses are, however, unlikely to be co-adapted due  
54 to their lack of recent coevolutionary history and may, therefore, initially have low fitness.

55 Indeed, despite the adaptive potential of partner-switching, new host-symbiont pairings, like  
56 genetic mutations, may more often be deleterious than beneficial to host fitness due to  
57 phenotypic mismatches or genetic incompatibilities. This has been observed in a range of  
58 symbiotic interactions: for example, a newly acquired *Symbiodinium* endosymbiont was  
59 found to translocate less fixed carbon than the native symbiont to its cnidarian host (13);  
60 novel bacterial endosymbionts had reduced vertical transmission rates in aphid hosts (14);  
61 and novel *Wolbachia* endosymbionts reduced the reproductive fitness of *Drosophila*  
62 *simulans* (15). How then do newly-formed, poorly co-adapted host-symbiont pairings  
63 become stable, beneficial symbioses? We hypothesise that rapid compensatory evolution  
64 could allow partner-switched symbioses to overcome their initially low fitness. Indeed, there  
65 is some, albeit limited, experimental evidence to support this idea: For example, the high  
66 fitness cost of newly acquired *Spiroplasma* endosymbionts in *Drosophila melanogaster* was  
67 ameliorated within only 17 host generations (16), although the underlying mechanisms of  
68 this fitness recovery remain unknown.

69

70 The microbial symbiosis between *Paramecium bursaria* and *Chlorella* provides an  
71 experimentally tractable model system to study intergenomic epistasis and the underlying  
72 molecular mechanisms. The ciliate host, *P. bursaria*, is a single-celled eukaryote, and each  
73 host cell contains 100-600 cells of the algal endosymbiont, *Chlorella* (17, 18). The *P.*  
74 *bursaria* - *Chlorella* symbiosis is based on a primary nutrient exchange of fixed carbon from  
75 the photosynthetic alga for organic nitrogen from the heterotrophic host (17, 19). This  
76 symbiosis is geographically widespread and genetically diverse, in part due to its multiple  
77 independent evolutionary origins (20, 21). The primary nutrient exchange is convergent  
78 among these origins, facilitating partner-switching, with concurrent divergence in other  
79 metabolic traits, causing phenotypic mismatches in partner-switched host-symbiont pairings  
80 (22). Here, using experimental partner-switches, we examined the pattern and mechanisms  
81 of intergenomic epistasis for three diverse host-symbiont strains, observing significant  $G^H \times$   
82  $G^S \times E$  interactions for host-symbiont growth rate and symbiont load, together with

83 corresponding differences in metabolism. We then experimentally evolved a low fitness  
84 partner-switched host-symbiont pairing for ~50 host generations. We observed rapid  
85 compensatory evolution that improved fitness to equal to that of the native host-symbiont  
86 pairing mediated by evolved changes in symbiont load and metabolism.

87

## 88 **Results and Discussion**

89 **Intergenomic epistasis for host-symbiont growth and symbiont load.** We constructed  
90 all possible host-symbiont genotype pairings ( $n = 9$ ) of 3 diverse strains of *Paramecium-*  
91 *Chlorella* and confirmed their identity by diagnostic PCR (Figure S1). We measured the  
92 growth reaction norm of each host-symbiont pairing across a light gradient (Figure 1a). All  
93 host-symbiont pairings showed the classic photosymbiotic reaction norm (23), such that  
94 growth rate increased with irradiance, but we observed significant intergenomic epistasis for  
95 host-symbiont growth rate ( $G^H \times G^S \times E$  interaction, ANOVA,  $F_{17,162} = 18.81$ ,  $P < 0.001$ ). This  
96 was driven by contrasting effects of symbiont genotype on growth in the different host  
97 backgrounds across light environments. In the HK1 and HA1 host-backgrounds, similar  
98 growth reaction norms with light were observed for each symbiont genotype, whereas in the  
99 186b host background the growth reaction norm varied according to symbiont genotype.  
100 Interestingly, the native 186b host-symbiont pairing had both the lowest intercept and the  
101 highest slope, indicating that in the 186b host background the native algal symbiont  
102 genotype was costlier in the dark yet more beneficial in high-light environments than non-  
103 native algal symbiont-genotypes.

104

105 *P. bursaria* host cells regulate their algal symbiont load according to light irradiance to  
106 maximise the benefit-to-cost ratio of symbiosis, such that, for naturally occurring host-  
107 symbiont pairings, symbiont load peaks at low irradiance and is reduced both in the dark and  
108 at high irradiance (23–25). To test if regulation of symbiont load varied among host-symbiont  
109 pairings, we measured symbiont load across the light gradient as the intensity of single-cell  
110 fluorescence by flow cytometry (Figure 1b). All host-symbiont pairings showed the expected

111 unimodal symbiont load curve with light, but nevertheless we observed significant  
112 intergenomic epistasis for symbiont load ( $G^H \times G^S \times E$  interaction, ANOVA,  $F_{17,162} = 3.78$ ,  
113  $P < 0.001$ ). Whereas, in the HA1 host similar symbiont load reaction norms were observed for  
114 each symbiont genotype, for the HK1 and 186b host backgrounds the form of the symbiont  
115 load reaction norms varied according to symbiont genotype. In the HK1 host, the magnitude  
116 of the symbiont load varied by symbiont genotype, such that higher symbiont loads were  
117 observed for the native compared to the non-native symbiont-genotypes. In the 186b host,  
118 peak symbiont load occurred at different light levels according to symbiont genotype, such  
119 that for the native symbiont the symbiont load curve peaked at a higher light intensity when  
120 compared to the non-native symbionts. (For the full output of the polynomial model, see  
121 Table S1.) This suggests that the HK1 and 186b host-genotypes discriminated among  
122 symbiont-genotypes, and then regulated symbiont load accordingly.

123

124 **Metabolic mechanisms of intergenomic epistasis.** To investigate the potential metabolic  
125 mechanisms underlying the observed intergenomic epistasis we performed untargeted  
126 global metabolomics with ESI-ToF-MS independently for the host and symbiont metabolite  
127 fractions for each host-symbiont pairing across the light gradient (22). Light irradiance was  
128 the primary driver of differential metabolism for both host and symbiont, however, host-  
129 dependent differences in the metabolism of symbiont-genotypes could be detected. For the  
130 symbiont metabolite fraction subset by host-genotype, we observed native versus non-native  
131 clustering of symbiont metabolism only when associated with the 186b host-genotype (PCA  
132 Figures S2, OPLS-DA Figure S3). This is consistent with the larger phenotypic differences in  
133 growth and symbiont load observed among host-symbiont pairings with the 186b host-  
134 genotype compared to with either the HK1 or HA1 host-genotypes. Pairwise contrasts of the  
135 symbiont-genotypes in the 186b host-genotype background revealed a range of candidate  
136 symbiont metabolites which distinguished the native pairing from either non-native host-  
137 symbiont pairing. Putative identifications included, in the dark, elevated levels of candidate  
138 metabolites associated with stress responses (stress-associated hormones, jasmonic acid

139 and abscisic acid, and stress associated-fatty acids, such as arachidonic acid) but reduced  
140 production of vitamins and co-factors by the native symbiont, compared to the non-native  
141 symbionts (Table S2). At high irradiance, the native symbiont showed higher levels of  
142 candidate metabolites in central metabolism, hydrocarbon metabolism and of biotin (vitamin  
143 B7), compared to the non-native symbionts (Table S3). In contrast, the non-native symbionts  
144 produced elevated levels, relative to native symbionts, of a candidate glutathione derivative;  
145 glutathione is an antioxidant involved in the ascorbate-glutathione cycle that combats high  
146 UV stress through radical oxygen scavenging (26, 27). Together, these data suggest that  
147 intergenomic epistasis can derive from mismatches in photoprotection and consequent  
148 responses to light stress by symbionts in novel host-symbiont pairings.

149

150 **Rapid compensatory evolution can rescue an initially low fitness partner-switched**  
151 **symbiosis.** The partner-switched pairing of the 186b host with the HK1 symbiont showed  
152 substantially reduced growth at high light relative to the native 186b host-symbiont pairing.  
153 To test if this fitness deficit could be overcome through compensatory evolution, we  
154 established six replicate populations of each of these two symbiotic partnerships, which  
155 were propagated by weekly serial transfer for 25 transfers (approximately 50 host  
156 generations) at a high light regime (50 $\mu$ E; 14:10 L:D). The growth rate per transfer was  
157 higher for the native pairing than the non-native pairing (Figure S4) (linear mixed effect  
158 model, HK1 symbiont fixed effect of  $-0.08 \pm 0.006$ , T-value = -14.126, see Table S1 for full  
159 statistical output), but increased over time for both pairings (transfer number fixed effect  
160  $0.001 \pm 0.0004$ , T-value = 3.088). To test for adaptation, we compared the fitness effect of  
161 symbiosis at the beginning and the end of the transfer experiment by direct competition of  
162 either the ancestral or evolved host-symbiont pairings against the symbiont-free ancestral  
163 186b host genotype across a light gradient. Starting fitness of symbiotic relative to non-  
164 symbiotic hosts increased more steeply with irradiance for the native than the partner-  
165 switched non-native pairing (Figure 2), but this difference had disappeared after evolution,  
166 such that both the native and non-native host-symbiont pairings showed increasing fitness

167 relative to non-symbiotic hosts with increasing irradiance (symbiont genotype by light  
168 intensity by transfer number interaction term: ANOVA,  $F_{7,45} = 6.20$ ,  $P < 0.001$ ). Indeed, at 50  
169  $\mu\text{E m}^{-2} \text{s}^{-1}$ , the light level used in the selection experiment, the large fitness deficit observed  
170 between the native and non-native pairing at the beginning of the experiment had been  
171 completely compensated. Comparison of the growth reaction norms of the evolving  
172 populations over time suggested that this amelioration occurred rapidly: By the tenth  
173 transfer, the native and non-native host-symbiont pairings showed equivalent growth  
174 responses to light (Welch t-test  $t(45.96) = -0.26$ ,  $p = 0.80$ ), in contrast to their substantially  
175 different ancestral growth reaction norms observed at the start of the evolution experiment  
176 (Welch t-test  $t(35.79) = 3.59$ ,  $p = < 0.001$ ) (Figure S5). These data suggest that newly  
177 established partner-switched symbioses can rapidly achieve equivalent growth performance  
178 and fitness benefits as the native host-symbiont pairing by compensatory evolution.

179

180 **Evolved changes in symbiont load regulation and metabolism.** To understand the  
181 mechanisms of compensatory evolution, we first compared the symbiont load reaction  
182 norms of the ancestral and evolved native and non-native pairings (Figure 3). Both ancestral  
183 host-symbiont pairings showed the expected unimodal symbiont load curve with light, albeit  
184 with higher symbiont loads for the native compared to the non-native pairing at the highest  
185 light level, 50  $\mu\text{E m}^{-2} \text{s}^{-1}$  irradiance, as used in the transfer experiment. Following evolution,  
186 the functional forms of the symbiont load reaction norms were altered in both the native and  
187 non-native pairings. Most notably, at 50  $\mu\text{E m}^{-2} \text{s}^{-1}$  irradiance, whereas the non-native pairing  
188 had increased symbiont load, symbiont load had decreased in the native pairing, such that  
189 symbiont load was now higher in the non-native pairing (transfer by symbiont genotype  
190 interaction at high light: ANOVA,  $F_{3,20} = 16.88$ ,  $P < 0.001$ ). Higher symbiont loads may  
191 therefore have contributed to the observed increased fitness of evolved compared to  
192 ancestral non-native pairings in the high light environment.

193



194 Next, to investigate the underlying metabolic mechanisms, we performed untargeted  
195 metabolomics analyses on the separated *Chlorella* and *P. bursaria* fractions from samples  
196 taken the start and end of the evolution experiment grown at  $50 \mu\text{E m}^{-2} \text{s}^{-1}$ . The ancestral *P.*  
197 *bursaria* and *Chlorella* metabolic profiles of native and non-native host-symbiont pairings  
198 could be clearly distinguished. Following evolution, *P. bursaria* metabolism displayed a high  
199 degree of convergence between hosts evolved with the native versus the non-native  
200 symbionts (Figure 4a,c). This was driven by decreased levels of compounds of central  
201 metabolism (such as pyruvate and TCA cycle intermediates, antioxidants, lipids, and some  
202 amino acids) (Table S4), suggesting either increased pathway completion or a reduced  
203 metabolic rate, both of which can lead to increased efficiency. In addition, we observed  
204 increased levels of the amino acid cysteine and a shikimate pathway component in hosts  
205 evolved with the native versus the non-native symbionts (Figure S6). Levels of algal-cell  
206 degradation components (Figure S6), such as cell-wall degradation product chitotriose, were  
207 increased in some replicates of hosts evolved with either symbiont, potentially suggesting  
208 increased digestion of *Chlorella*, which is a known mechanism by which hosts control their  
209 symbiont load (28, 29).

210

211 In contrast, evolved changes to the metabolic profiles of the algal symbiont genotypes  
212 showed less consistent differences among treatments (Figure 4b,d). Whereas all replicates  
213 of the native 186b *Chlorella* evolved in a similar direction, the replicates of the non-native  
214 HK1 *Chlorella* evolved in two different directions. Two of the HK1 replicates took a similar  
215 trajectory to the 186b symbionts, while the remaining four replicates all followed an  
216 alternative evolutionary trajectory. The group of four HK1 replicates that diverged during the  
217 experiment had lower production of metabolites within core aspects of metabolism, such as  
218 lipids, amino acids and carbohydrates. The second group, including the remaining two HK1  
219 replicates and all the 186b replicates, had higher production of metabolites within primary  
220 metabolism pathways, particularly within lipids and carbohydrates, as well as a key  
221 chlorophyll compound, a photo-protective carotenoid, and secondary metabolites with

222 potential antioxidant properties (Figure S7, Table S5). This greater investment into  
223 photosynthesis and photo-protection may improve carbon transfer to the host (30, 31), and  
224 decrease light stress, which aligns with the decrease in host antioxidants. Interestingly, the  
225 two HK1 replicates that converged metabolically with the native symbionts had a lower  
226 increase in symbiont load compared to the replicates that metabolically diverged (Table S6).  
227 This implies that the evolution of metabolism and symbiont load were linked, and that overall  
228 two alternative strategies of compensatory evolution emerged: either to have fewer, more  
229 beneficial symbionts or to have more, less-beneficial symbionts.

230

## 231 **Conclusion**

232 Partner switching plays an important role in the evolution of a wide range of symbioses (2, 4,  
233 5, 32, 33) enabling adaptation to changing environments and recovery from the breakdown  
234 of symbiosis. Because of intergenomic epistasis, partner-switched symbioses may possess  
235 novel adaptive phenotypes, but will sometimes exhibit low fitness due to mismatches  
236 between host and symbiont traits, owing to their lack of recent coevolutionary history (14, 15,  
237 34). In the *Paramecium-Chlorella* symbiosis, low fitness following partner switching arose  
238 from mismatching photoprotection traits and the resulting light stress experienced by non-  
239 native symbionts when in high light environments, resulting in poor host-symbiont growth.  
240 This corresponds with findings from other photosynthetic symbioses, including coral-  
241 *Symbiodinium* and *Hydra-Chlorella*, where mismatching thermal and light stress tolerances  
242 contribute to the breakdown of symbiosis (35–38). Low fitness, partner-switched host-  
243 symbiont pairings were rescued by compensatory evolution, which took one of two routes:  
244 Either, hosts evolved higher symbiont loads to mitigate for their new algal symbiont's poor  
245 performance, or the algal symbionts themselves evolved higher investment in  
246 photosynthesis and photoprotection traits to better mitigate light stress. Both strategies  
247 increased host-symbiont growth of the non-native pairing, leading to higher fitness  
248 equivalent to that of the native pairing. Together, these data suggest that, partner-switching

249 combined with rapid compensatory evolution is likely to contribute to the recovery and local  
250 adaptation of symbioses in response to changing environments.

251  
252  
253  
254  
255

## Materials and Methods

### 256 *Cultures & Strains*

257 The three natural strains used were: 186b (CCAP 1660/18) obtained from the Culture  
258 Collection for Algae and Protozoa (Oban, Scotland), and HA1 and HK1 isolated in Japan  
259 and obtained from the Paramecium National Bio-Resource Project (Yamaguchi, Japan). *P.*  
260 *bursaria* stock cultures were maintained at 25°C under a 14:10 L:D cycle with 50  $\mu\text{E m}^{-2} \text{s}^{-1}$  of  
261 light. The stocks were maintained by batch culture in bacterized Protozoan Pellet Media  
262 (PPM, Carolina Biological Supply), made to a concentration of 0.66 g L<sup>-1</sup> with Volvic natural  
263 mineral water, and inoculated approximately 20 hours prior to use with *Serratia marscesens*  
264 from frozen glycerol stocks.

265

266 To isolate *Chlorella* from the symbiosis, symbiotic cultures were first washed and  
267 concentrated with a 11 $\mu\text{m}$  nylon mesh using sterile Volvic. The suspension was then  
268 ultrasonicated using a Fisherbrand™ Q500 Sonicator (Fisher Scientific, NH, USA), at a  
269 power setting of 20% for 10 seconds sonification to disrupt the host cells. The liquid was  
270 then spotted onto Bold Basal Media plates (BBM) (39), from which green colonies were  
271 streaked out and isolated over several weeks. Plate stocks were maintained by streaking out  
272 one colony to a fresh plate every 3/4 weeks.

273

274 Symbiont-free *P. bursaria* were made by treating symbiotic cultures with paraquat (10  $\mu\text{g}$   
275 mL<sup>-1</sup>) for 3 to 7 days in high light conditions (>50  $\mu\text{E m}^{-2} \text{s}^{-1}$ ), until the host cells were visibly  
276 symbiont free. The cultures were then extensively washed with Volvic and closely monitored  
277 with microscopy to check that re-greening by *Chlorella* did not occur. Stock cultures of the  
278 symbiont-free cells were maintained by batch culture at 25°C under a 14:10 L:D cycle with 3  
279  $\mu\text{E m}^{-2} \text{s}^{-1}$  of light and were given fresh PPM weekly.

280

### 281 *Cross infection*

282 Symbiont-free populations of the three *P. bursaria* strains were re-infected by adding a  
283 colony of *Chlorella* from the plate stocks derived from the appropriate strain. This was done  
284 with all three of the isolated *Chlorella* strains to construct all possible host-symbiont  
285 genotype pairings (n=9). The regreening process was followed by microscopy and took

286 between 2-6 weeks. Over the process, cells were grown at the intermediate light level of 12  
287  $\mu\text{E m}^{-2} \text{s}^{-1}$  and were given bacterized PPM weekly.

288

### 289 *Diagnostic PCR*

290 The correct algae genotype within the cross-infections was confirmed using diagnostic PCR.

291 The *Chlorella* DNA was extracted by isolating the *Chlorella* and then using a standard 6%

292 Chelex100 resin (Bio-Rad) extraction method. A nested PCR technique with overlapping,

293 multiplex Chlorophyta specific primers were used as described by Hoshina et al. (40).

294 Standard PCR reactions were performed using Go Taq Green Master Mix (Promega) and

295  $0.5\mu\text{mol L}^{-1}$  of the primer. The thermocycler programme was set to: 94°C for 5min, 30 cycles

296 of (94°C for 30sec, 55°C for 30sec, 72°C for 60sec), and 5 min at 72°C.

297

### 298 *Growth rate*

299 Growth rates of the symbioses were measured across a light gradient. The cells were

300 washed and concentrated with a 11 $\mu\text{m}$  nylon mesh using sterile Volvic and re-suspended in

301 bacterized PPM. The cultures were then split and acclimated to their treatment light

302 condition (0, 12, 24, & 50  $\mu\text{E m}^{-2} \text{s}^{-1}$ ) for five days. The cultures were then re-suspended in

303 bacterized PPM to a target cell density of 150 cell  $\text{mL}^{-1}$ . Cell densities were measured at 0,

304 24, 48 and 72 hours by fixing 360 $\mu\text{L}$  of each cell culture, in triplicate, in 1% v/v

305 glutaraldehyde in 96-well flat-bottomed micro-well plates. Images were taken with a plate

306 reader (Tecan Spark 10M) and cell counts were made using an automated image analysis

307 macro in ImageJ v1.50i (41).

308

### 309 *Symbiont load*

310 The symbiont load was measured in cultures derived from the growth rate experiment so

311 that the data could be integrated between the two measurements. Triplicate 300 $\mu\text{l}$  samples

312 of each cell culture were taken from 72-hour cultures for flow cytometry analysis. Host

313 symbiont load was estimated using a CytoFLEX S flow cytometer (Beckman Coulter Inc.,

314 CA, USA) by measuring the intensity of chlorophyll fluorescence for single *P. bursaria* cells

315 (excitation 488nm, emission 690/50nm) and gating cell size using forward side scatter; a

316 method established by Kadono et al. (18). The measurements were calibrated against 8-

317 peak rainbow calibration particles (BioLegend), and then presented as relative fluorescence

318 to reduce variation across sampling sessions.

319

### 320 *Partner-switching - Metabolomics*

321 Cultures of the symbiotic pairings were washed and concentrated with a 11 $\mu\text{m}$  nylon mesh

322 using sterile Volvic and re-suspended in bacterized PPM. The cultures were then split and

323 acclimated at their treatment light condition (0, 12 & 50  $\mu\text{E m}^{-2} \text{s}^{-1}$ ) for seven days. The  
324 symbiotic partners were separated in order to get *P. bursaria* and *Chlorella* metabolic  
325 fraction. The *P. bursaria* cells were concentrated with a 11 $\mu\text{m}$  nylon mesh using Volvic and  
326 then the *P. bursaria* cells were disrupted by sonication (20% power for 10 secs). 1ml of the  
327 lysate was pushed through a 1.6 $\mu\text{m}$  filter, which caught the intact *Chlorella* cells, and the  
328 run-through was collected and stored as the *P. bursaria* fraction. The 1.6 $\mu\text{m}$  filter was  
329 washed with 5ml cold deionized water, and then reversed so that the *Chlorella* cells were  
330 resuspended in 1ml of cold methanol, which was stored as the *Chlorella* fraction. After which  
331 the *Chlorella* fraction samples were already in methanol, but the *P. bursaria* fraction samples  
332 had then to be diluted by 50% with methanol.

333

334 Metabolic profiles were recorded using ESI ToF-MS, on the Qstar Elite with automatic  
335 injection using Waters Alliance 2695 HPLC (no column used), in positive mode. This is an  
336 established high-throughput method with a large mass range (50 Da to 1000 Da).

337

338 Mass spectrometry settings:

|     |                         |                                                                |
|-----|-------------------------|----------------------------------------------------------------|
| 339 | Polarity:               | positive                                                       |
| 340 | Ion Spray voltage:      | 4.2 kV                                                         |
| 341 | Declustering potential: | 120 V                                                          |
| 342 | Focusing potential:     | 265 V                                                          |
| 343 | Source temperature:     | 200 $^{\circ}\text{C}$                                         |
| 344 | Gas Flow:               | 40 ml $\text{min}^{-1}$                                        |
| 345 | Solvent:                | 50:50 methanol to water at flow rate 40 $\mu\text{l min}^{-1}$ |
| 346 | Injected volume:        | 10 $\mu\text{l}$                                               |

347

348 The processing was performed using in-house software Visual Basic macro 216 (42), which  
349 combined the spectra across the technical replicates by binning the crude m/z values into  
350 0.2-unit bins. The relative mass abundances (% total ion count) for each bin was summed.  
351 Pareto scaling was applied to the results, and the data was then analysed by principal  
352 component analysis using SIMCA-P software (Umetrics). When treatment-based separation  
353 was observed, supervised orthogonal partial least squares discriminant analysis (OPLS-DA)  
354 separation was then performed using the discriminatory treatment with the SIMCA-P  
355 software.

356

357 *Partner-switching - Identification of significant masses*

358 Masses of interest were annotated using the initial identifications from the in-house

359 software program and further comparisons against KEGG (<https://www.genome.jp/kegg/>)  
360 (43, 44) and Metlin (<https://metlin.scripps.edu>) (45) databases. The Metabolomics Standards  
361 Initiative requires two independent measures to confirm identity, this partner-switching  
362 metabolomic analysis only used one measure (accurate mass) and therefore, meets only the  
363 level 2 requirements of putative annotated compounds.

364

### 365 *Evolution Experiment*

366 The populations used derive from the cross-infections and, therefore, the  
367 symbiotic partnerships come from the same cured 186b ancestor that was then re-infected  
368 with either its native (186b) or novel (HK1) symbionts. The two symbiotic partnerships were  
369 split into six replicate populations that were used as the starting populations. The 200ml  
370 populations were propagated by weekly serial transfer for 25 transfers at a high light ( $50 \mu\text{E}$   
371  $\text{m}^{-2} \text{s}^{-1}$ ) 14:10 L:D cycle. At every transfer, cell-density was equalised to  $100 \text{ cells mL}^{-1}$  and  
372 the transferred cells were washed with a  $11 \mu\text{m}$  nylon mesh using Volvic before being re-  
373 suspended in bacterized PPM. Cell density was measured before and after each transfer by  
374 fixing  $360 \mu\text{L}$  of each cell culture, in triplicate, in 1% v/v glutaraldehyde in 96-well flat-  
375 bottomed micro-well plates. Images were taken with a plate reader (Tecan Spark 10M) and  
376 cell counts were made using an automated image analysis macro in ImageJ v1.50i (41).  
377 Growth rate and symbiont load assays were conducted at the start, T10, T20 and end of the  
378 experiment using the method described above.

379

### 380 *Evolution experiment - Fitness assay*

381 Fitness assays were conducted at the start and end of the evolution experiment. *P. bursaria*  
382 cultures, both the symbiotic pairings and the symbiont-free ancestor, were washed with  
383 Volvic and resuspended in bacterized PPM. The cultures were then split and acclimated at  
384 their treatment light level ( $0, 12, 50 \mu\text{E m}^{-2} \text{s}^{-1}$ ) for five days. Cell densities were counted by  
385 fixing  $360 \mu\text{L}$  of each cell culture, in triplicate, in 1% v/v glutaraldehyde in 96-well flat-  
386 bottomed micro-well plates. Images were taken with a plate reader (Tecan Spark 10M) and  
387 cell counts were made using an automated image analysis macro in ImageJ v1.50i (41). The  
388 competitions were started by setting up microcosms that each contained 50:50 populations  
389 of green and white cells (with target values of 20 green cells and 20 white cells per mL) that  
390 were in direct competition. Cells were sampled on day 0 and day 7 on a flow cytometer and  
391 the proportion of green to white cells was measured and used to calculate the selection rate.  
392 Green versus white cells were distinguished using single cell fluorescence estimated using a  
393 CytoFLEX S flow cytometer (Beckman Coulter Inc., CA, USA) by measuring the intensity of  
394 chlorophyll Fluorescence (excitation 488nm, emission 690/50nm) and gating cell size using  
395 forward side scatter; a method established by Kadono et al. (18). The measurements were



396 calibrated against 8-peak rainbow calibration particles (BioLegend), and then presented as  
397 relative fluorescence to reduce variation across sampling sessions. The re-establishment of  
398 endosymbiosis takes between 2-4 weeks, and this method was tested to ensure that the  
399 symbiont-free cells do not re-green over the course of the experiment.

400

#### 401 *Evolution experiment - Metabolomics*

402 The cultures were sampled at the start and end of the evolution experiment. Cultures were  
403 washed and concentrated with a 11µm nylon mesh using Volvic and re-suspended in  
404 bacterized PPM. The cultures were acclimated at their treatment light condition (50 µE m<sup>-2</sup> s<sup>-1</sup>)  
405 for seven days. For the start point, the six experimental replicates were used as replicates  
406 for the metabolomics. For the end point, three replicates of each of the six experimental  
407 replicates were used for the metabolomics because divergence may have occurred over the  
408 course of the experiment. At each sampling event, the symbiotic partners were separated in  
409 order to get *P. bursaria* and *Chlorella* metabolic fraction using the extraction method  
410 described above. Samples were freeze-dried for storage, and then resuspended in 50:50  
411 methanol to water prior to mass spectrometry.

412

413 The samples were analysed with a Synapt G2-Si with Acuity UPLC, recording in positive  
414 mode over a large untargeted mass range (50 – 1000 Da). A 2.1x50mm Acuity UPLC BEH  
415 C18 column was used with acetonitrile as the solvent. The machine settings are listed in  
416 detail below:

417

418 Mass spectrometry settings:

|     |                          |                        |
|-----|--------------------------|------------------------|
| 419 | Polarity:                | positive               |
| 420 | Capillary voltage:       | 2.3 kV                 |
| 421 | Sample Cone voltage:     | 20 V                   |
| 422 | Source Temperature:      | 100°C                  |
| 423 | Desolvation temperature: | 280°C                  |
| 424 | Gas Flow:                | 600 L hr <sup>-1</sup> |
| 425 | Injected volume:         | 5µl                    |
| 426 | Column temperature:      | 45°C                   |

427

428 Gradient information:

429  
430  
431  
432  
433

| Time (mins) | Water (%) | Acetonitrile (%) |
|-------------|-----------|------------------|
| 0           | 95        | 5                |
| 3           | 65        | 35               |
| 6           | 0         | 100              |
| 7.5         | 0         | 100              |
| 7.6         | 95        | 5                |

434 The *P. bursaria* and *Chlorella* fraction were analysed separately. The xcms R package (46–  
435 48) was used to extract the spectra from the CDF data files, using a step argument of 0.01  
436 m/z. Peaks were identified, and then grouped across samples. These aligned peaks were  
437 used to identify and correct correlated drifts in retention time from run to run. Pareto scaling  
438 was applied to the resulting intensity matrix.

439

#### 440 *Evolution experiment - Metabolomics analysis*

441 The metabolic profiles from the start and end of the experiment were compared using  
442 principal component analysis (PCA) with the `prcomp()` function in Base R  
443 (<https://www.rproject.org/>). For both fractions the first three components were considered,  
444 this accounted for >88% of the variance. The top 1% of the loadings were selected using the  
445 absolute magnitude of the loadings. These top loadings were identified where possible, and  
446 the identified loadings were then depicted in their associated component space. The relative  
447 abundance of these top loadings was visualised using heatmaps drawn with the `heatmap.2()`  
448 function from the `gplot` package (49). The phylogenies were based on UPGMA clustering of  
449 the PCA coordinates of the samples using the `hclust()` function. This approach of integrating  
450 metabolic data and genotypes in heatmaps has been used previously (50).

451

#### 452 *Evolution experiment - Identification of significant masses*

453 Masses of interest were investigated using the MarVis-Suite 2.0 software  
454 (<http://marvis.gobics.de/>) (51), using retention time and mass to compare against KEGG  
455 (<https://www.genome.jp/kegg/>) (43, 44) and MetaCyc (<https://biocyc.org/>) (52) databases.  
456 The Metabolomics Standards Initiative requires two independent measures to confirm  
457 identity, which the combination of retention time and accurate mass achieves for the  
458 analysis of the evolution experiment metabolomics.

459

#### 460 Data Analysis

461 Statistical analyses were performed in Rv.3.5.0 (53) and all plots were produced using  
462 package `ggplot2` (54) unless otherwise stated. Physiology tests were analysed by both  
463 ANOVA and ANCOVA, with transfer time, host and symbiont identity as factors. A linear  
464 mixed effect model was used to analysis the growth rate per transfer using `lm()` function from  
465 the `nlme` package (55). The `lm` model included fixed effects of symbiont genotype and



466 transfer number, and random effects of transfer number given sample ID. Details of the  
467 statistical methods used are within the supplementary statistics table (Table S1).

468

#### 469 **Acknowledgements**

470 This work was funded by grants NE/K011774/2 and NE/V000128/1 from the Natural  
471 Environment Research Council, UK to M.A.B, D.D.C, and A.J.W and a White Rose DTP  
472 studentship from the Biotechnology and Biological Sciences Research Council, UK  
473 (BB/011151/1) to M.E.S.S. The funders had no role in the design of the study, the collection,  
474 analysis and interpretation of data or writing of the manuscript. We are grateful to Heather  
475 Walker for her technical assistance with the mass spectrometry.

476

477 **References:**

- 478 1. J. L. Sachs, E. L. Simms, Pathways to mutualism breakdown. *Trends in Ecology &*  
479 *Evolution* **21**, 585–592 (2006).
- 480 2. N. M. Boulotte, *et al.*, Exploring the *Symbiodinium* rare biosphere provides evidence for  
481 symbiont switching in reef-building corals. *The ISME Journal* **10**, 2693–2701 (2016).
- 482 3. C. Lefèvre, *et al.*, Endosymbiont Phylogenesis in the Dryophthoridae Weevils:  
483 Evidence for Bacterial Replacement. *Mol Biol Evol* **21**, 965–973 (2004).
- 484 4. R. Koga, N. A. Moran, Swapping symbionts in spittlebugs: evolutionary replacement of  
485 a reduced genome symbiont. *The ISME Journal* **8**, 1237–1246 (2014).
- 486 5. Y. Matsuura, *et al.*, Recurrent symbiont recruitment from fungal parasites in cicadas.  
487 *PNAS* **115**, E5970–E5979 (2018).
- 488 6. K. D. Heath, Intergenomic Epistasis and Coevolutionary Constraint in Plants and  
489 Rhizobia. *Evolution* **64**, 1446–1458 (2010).
- 490 7. J. N. Thompson, *The Geographic Mosaic of Coevolution* (University of Chicago Press,  
491 2005).
- 492 8. K. D. Heath, P. Tiffin, Context dependence in the coevolution of plant and rhizobial  
493 mutualists. *Proceedings of the Royal Society of London B: Biological Sciences* **274**,  
494 1905–1912 (2007).
- 495 9. J. B. Joy, Symbiosis catalyses niche expansion and diversification. *Proceedings of the*  
496 *Royal Society B: Biological Sciences* **280**, 20122820 (2013).
- 497 10. S. Sudakaran, C. Kost, M. Kaltenpoth, Symbiont Acquisition and Replacement as a  
498 Source of Ecological Innovation. *Trends in Microbiology* **25**, 375–390 (2017).
- 499 11. J. Jaenike, R. Unckless, S. N. Cockburn, L. M. Boelio, S. J. Perlman, Adaptation via  
500 Symbiosis: Recent Spread of a *Drosophila* Defensive Symbiont. *Science* **329**, 212–215  
501 (2010).
- 502 12. F. M. Jiggins, G. D. D. Hurst, Rapid Insect Evolution by Symbiont Transfer. *Science*  
503 **332**, 185–186 (2011).
- 504 13. J. L. Matthews, *et al.*, Partner switching and metabolic flux in a model cnidarian–  
505 dinoflagellate symbiosis. *Proceedings of the Royal Society B: Biological Sciences* **285**,  
506 20182336 (2018).
- 507 14. J. A. Russell, N. A. Moran, Horizontal Transfer of Bacterial Symbionts: Heritability and  
508 Fitness Effects in a Novel Aphid Host. *Appl. Environ. Microbiol.* **71**, 7987–7994 (2005).
- 509 15. E. A. McGraw, D. J. Merritt, J. N. Droller, S. L. O’Neill, *Wolbachia* density and virulence  
510 attenuation after transfer into a novel host. *PNAS* **99**, 2918–2923 (2002).
- 511 16. S. Nakayama, *et al.*, Can maternally inherited endosymbionts adapt to a novel host?  
512 Direct costs of *Spiroplasma* infection, but not vertical transmission efficiency, evolve  
513 rapidly after horizontal transfer into *D. melanogaster*. *Heredity* **114**, 539–543 (2015).
- 514 17. M. D. Johnson, The acquisition of phototrophy: adaptive strategies of hosting  
515 endosymbionts and organelles. *Photosynth Res* **107**, 117–132 (2011).

- 516 18. T. Kadono, T. Kawano, H. Hosoya, T. Kosaka, Flow cytometric studies of the host-  
517 regulated cell cycle in algae symbiotic with green paramecium. *Protoplasma* **223**, 133–  
518 141 (2004).
- 519 19. E. Ziesenisz, W. Reisser, W. Wiessner, Evidence of de novo synthesis of maltose  
520 excreted by the endosymbiotic *Chlorella* from *Paramecium bursaria*. *Planta* **153**, 481–  
521 485 (1981).
- 522 20. R. Hoshina, N. Imamura, Multiple Origins of the Symbioses in *Paramecium bursaria*.  
523 *Protist* **159**, 53–63 (2008).
- 524 21. M. Summerer, B. Sonntag, R. Sommaruga, Ciliate-Symbiont Specificity of Freshwater  
525 Endosymbiotic *Chlorella* (trebouxiophyceae, Chlorophyta)1. *Journal of Phycology* **44**,  
526 77–84 (2008).
- 527 22. M. E. Sørensen, *et al.*, Comparison of independent evolutionary origins reveals both  
528 convergence and divergence in the metabolic mechanisms of symbiosis. *Current*  
529 *Biology* (2020).
- 530 23. C. D. Lowe, E. J. Minter, D. D. Cameron, M. A. Brockhurst, Shining a Light on  
531 Exploitative Host Control in a Photosynthetic Endosymbiosis. *Current Biology* **26**, 207–  
532 211 (2016).
- 533 24. A. D. Dean, *et al.*, Host control and nutrient trading in a photosynthetic symbiosis.  
534 *Journal of Theoretical Biology* **405**, 82–93 (2016).
- 535 25. E. J. A. Minter, *et al.*, Variation and asymmetry in host-symbiont dependence in a  
536 microbial symbiosis. *BMC Evol Biol* **18**, 108 (2018).
- 537 26. N. Mallick, Copper-induced oxidative stress in the chlorophycean microalga *Chlorella*  
538 *vulgaris*: response of the antioxidant system. *J. Plant Physiol.* **161**, 591–597 (2004).
- 539 27. C.-T. Shiu, T.-M. Lee, Ultraviolet-B-induced oxidative stress and responses of the  
540 ascorbate-glutathione cycle in a marine macroalga *Ulva fasciata*. *J. Exp. Bot.* **56**,  
541 2851–2865 (2005).
- 542 28. Y. Kodama, M. Fujishima, Cycloheximide Induces Synchronous Swelling of Perialgal  
543 Vacuoles Enclosing Symbiotic *Chlorella vulgaris* and Digestion of the Algae in the  
544 Ciliate *Paramecium bursaria*. *Protist* **159**, 483–494 (2008).
- 545 29. Y. Kodama, M. Fujishima, Cell division and density of symbiotic *Chlorella variabilis* of  
546 the ciliate *Paramecium bursaria* is controlled by the host's nutritional conditions during  
547 early infection process. *Environmental Microbiology* **14**, 2800–2811 (2012).
- 548 30. N. E. Cantin, M. J. H. van Oppen, B. L. Willis, J. C. Mieog, A. P. Negri, Juvenile corals  
549 can acquire more carbon from high-performance algal symbionts. *Coral Reefs* **28**, 405  
550 (2009).
- 551 31. C. J. Freeman, R. W. Thacker, D. M. Baker, M. L. Fogel, Quality or quantity: is nutrient  
552 transfer driven more by symbiont identity and productivity than by symbiont  
553 abundance? *The ISME Journal* **7**, 1116–1125 (2013).
- 554 32. F. Husnik, J. P. McCutcheon, Repeated replacement of an intrabacterial symbiont in  
555 the tripartite nested mealybug symbiosis. *PNAS* **113**, E5416–E5424 (2016).

- 556 33. G. Rolshausen, F. D. Grande, A. D. Sadowska-Deś, J. Otte, I. Schmitt, Quantifying the  
557 climatic niche of symbiont partners in a lichen symbiosis indicates mutualist-mediated  
558 niche expansions. *Ecography* **41**, 1380–1392 (2018).
- 559 34. J. L. Matthews, *et al.*, Partner switching and metabolic flux in a model cnidarian–  
560 dinoflagellate symbiosis. *Proceedings of the Royal Society B: Biological Sciences* **285**,  
561 20182336 (2018).
- 562 35. V. M. Weis, Cellular mechanisms of Cnidarian bleaching: stress causes the collapse of  
563 symbiosis. *Journal of Experimental Biology* **211**, 3059–3066 (2008).
- 564 36. D. Abrego, K. E. Ulstrup, B. L. Willis, M. J. H. van Oppen, Species–specific interactions  
565 between algal endosymbionts and coral hosts define their bleaching response to heat  
566 and light stress. *Proceedings of the Royal Society B: Biological Sciences* **275**, 2273–  
567 2282 (2008).
- 568 37. S. Ye, M. Bhattacharjee, E. Siemann, Thermal Tolerance in Green Hydra: Identifying  
569 the Roles of Algal Endosymbionts and Hosts in a Freshwater Holobiont Under Stress.  
570 *Microb Ecol* **77**, 537–545 (2019).
- 571 38. E. J. Howells, *et al.*, Coral thermal tolerance shaped by local adaptation of  
572 photosymbionts. *Nature Climate Change* **2**, 116–120 (2012).
- 573 39. J. R. Stein, (ED.) *Handbook of Phycological Methods: Culture Methods and Growth*  
574 *Measurements* (Cambridge University Press, 1979).
- 575 40. R. Hoshina, Y. Kato, S. Kamako, N. Imamura, Genetic Evidence of “American” and  
576 “European” Type Symbiotic Algae of *Paramecium bursaria* Ehrenberg. *Plant biol*  
577 (*Stuttg*) **7**, 526–532 (2005).
- 578 41. C. A. Schneider, W. S. Rasband, K. W. Eliceiri, NIH Image to ImageJ: 25 years of  
579 image analysis. *Nature Methods* (2012) <https://doi.org/10.1038/nmeth.2089> (May 7,  
580 2018).
- 581 42. S. A. Overy, *et al.*, Application of metabolite profiling to the identification of traits in a  
582 population of tomato introgression lines. *J Exp Bot* **56**, 287–296 (2005).
- 583 43. M. Kanehisa, S. Goto, KEGG: kyoto encyclopedia of genes and genomes. *Nucleic*  
584 *Acids Res.* **28**, 27–30 (2000).
- 585 44. M. Kanehisa, Y. Sato, M. Furumichi, K. Morishima, M. Tanabe, New approach for  
586 understanding genome variations in KEGG. *Nucleic Acids Res.* **47**, D590–D595 (2019).
- 587 45. C. A. Smith, *et al.*, METLIN: a metabolite mass spectral database. *Ther Drug Monit* **27**,  
588 747–751 (2005).
- 589 46. H. P. Benton, E. J. Want, T. M. D. Ebbels, Correction of mass calibration gaps in liquid  
590 chromatography-mass spectrometry metabolomics data. *Bioinformatics* **26**, 2488–2489  
591 (2010).
- 592 47. C. A. Smith, E. J. Want, G. O’Maille, R. Abagyan, G. Siuzdak, XCMS: Processing  
593 Mass Spectrometry Data for Metabolite Profiling Using Nonlinear Peak Alignment,  
594 Matching, and Identification. *Anal. Chem.* **78**, 779–787 (2006).

- 595 48. R. Tautenhahn, C. Böttcher, S. Neumann, Highly sensitive feature detection for high  
596 resolution LC/MS. *BMC Bioinformatics* **9**, 504 (2008).
- 597 49. G. R. Warnes, *et al.*, gplots: Various R programming tools for plotting data. *R package*  
598 *version 2*, 1 (2009).
- 599 50. T. E. A. Cotton, *et al.*, Metabolic regulation of the maize rhizobiome by benzoxazinoids.  
600 *ISME J* **13**, 1647–1658 (2019).
- 601 51. A. Kaefer, *et al.*, MarVis: a tool for clustering and visualization of metabolic biomarkers.  
602 *BMC Bioinformatics* **10**, 92 (2009).
- 603 52. R. Caspi, *et al.*, The MetaCyc database of metabolic pathways and enzymes. *Nucleic*  
604 *Acids Res* **46**, D633–D639 (2018).
- 605 53. R Core Team, R: A Language and Environment for Statistical Computing (2018).
- 606 54. H. Wickham, ggplot2: Elegant Graphics for Data Analysis (2016).
- 607 55. J. Pinheiro, D. Bates, S. DebRoy, D. Sarkar, R core Team (2019), nlme: Linear and  
608 Nonlinear Mixed Effects Models (2019).
- 609
- 610
- 611
- 612

613 **Figures**

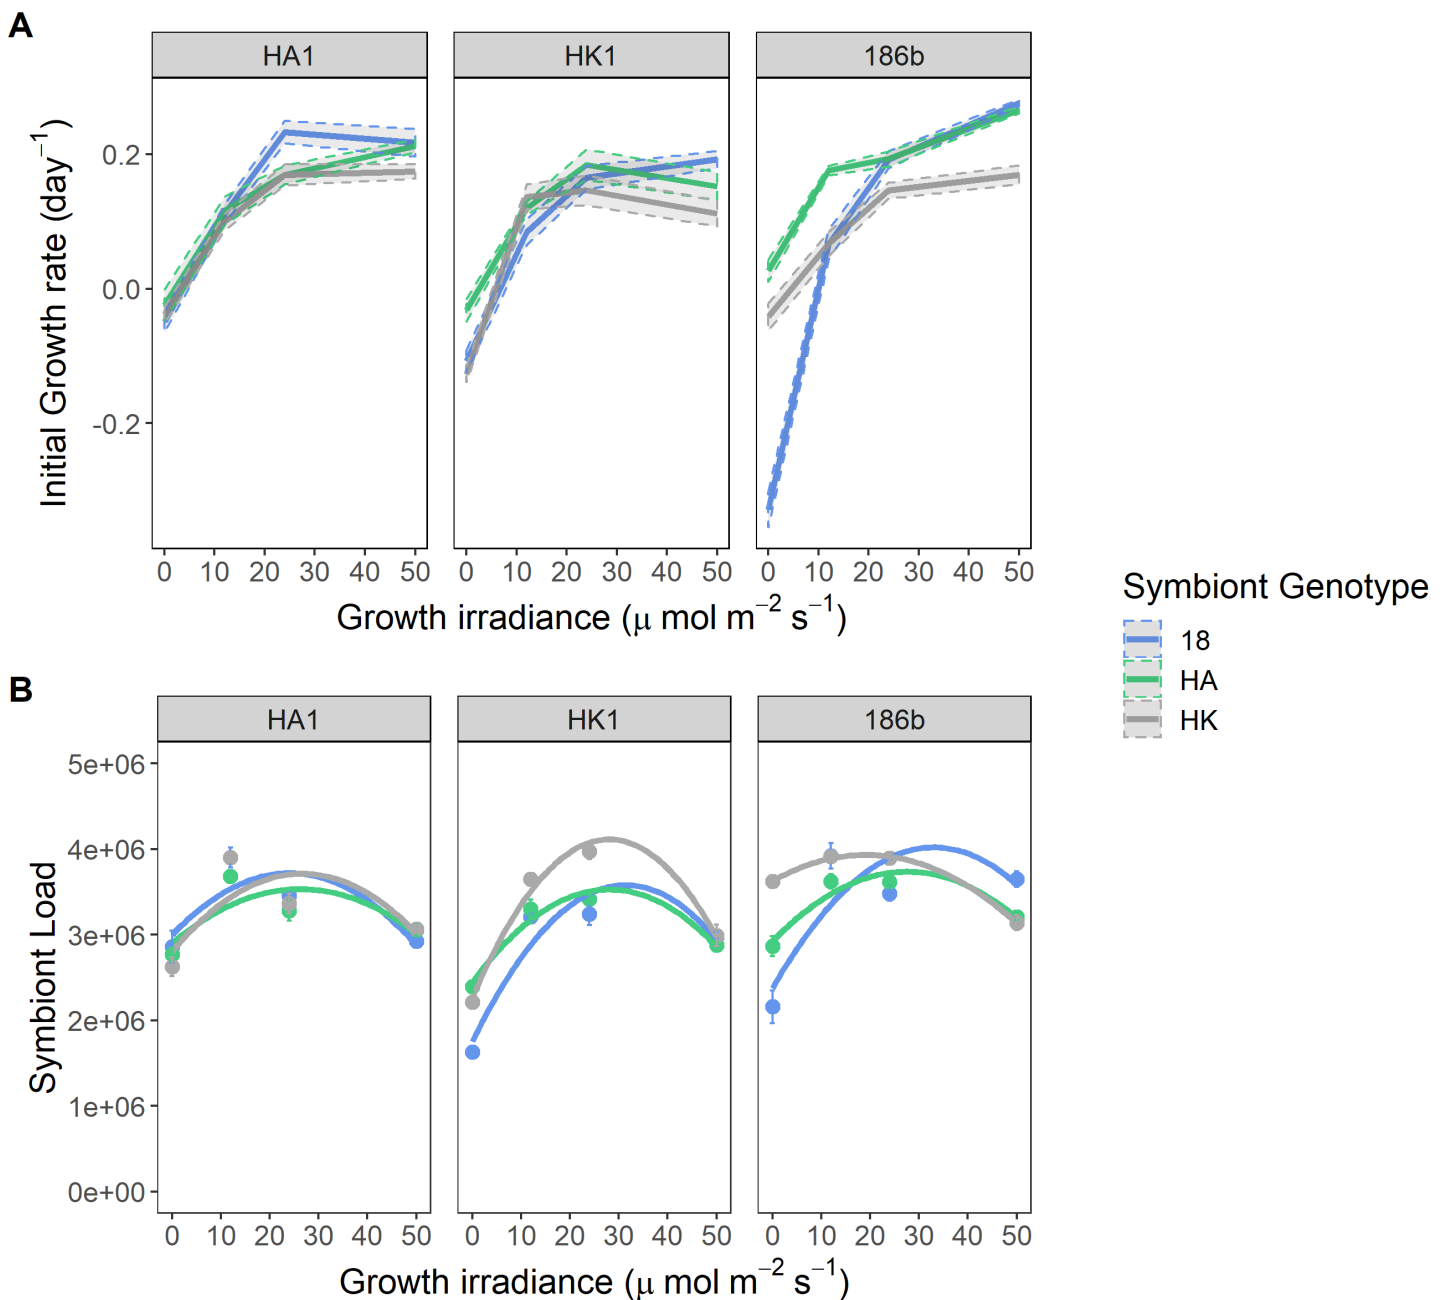

614 **Figure 1. Growth rates and symbiont loads of the host-symbiont pairings.** For both A  
615 and B, each panel presents the data for a specific genotype of *P. bursaria* host and the  
616 symbiont genotypes are distinguished by colour. A) Initial growth rates of the host-symbiont  
617 pairings across a light gradient. The data points show the mean (n=3) initial growth rate  $\pm$ SE.  
618 B) Symbiont load of the host-symbiont pairings across a light gradient. The data points show  
619 the mean (n=3) symbiont load, measured as relative chlorophyll fluorescence,  $\pm$ SE. The  
620 lines show polynomial models; the model coefficients showed a significant  $G^H \times G^S$   
621 interaction (ANOVA,  $F_{8,36} = 27.22$  (the intercept); 8.58 (first coefficient); 6.09 (second  
622 coefficient),  $P < 0.001$ ). For full statistical output see Table S1.

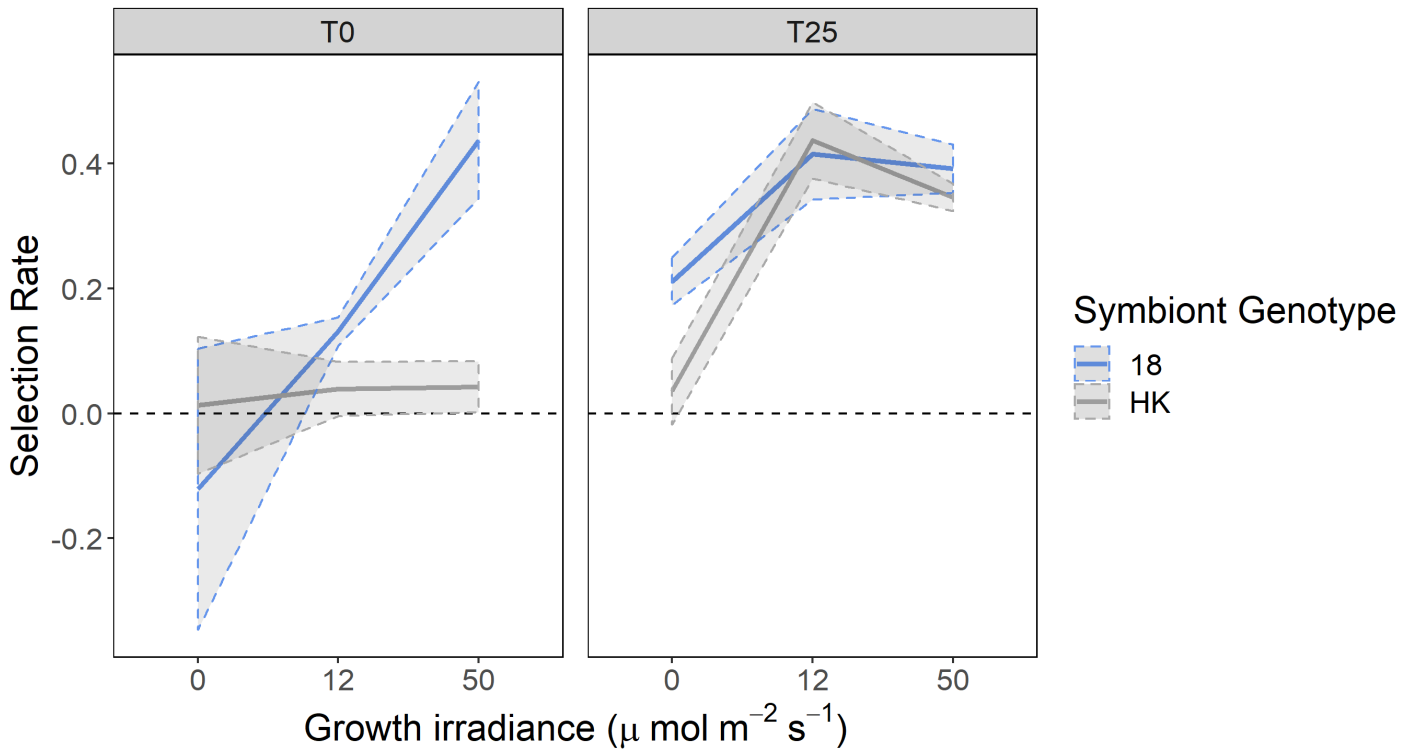

623

624

625 **Figure 2. Fitness of the host-symbiont pairings relative to the symbiont-free host at**  
626 **the start and end of the evolution experiment.** Lines show mean (n=6) competitive fitness  
627 of symbiont-containing hosts relative to the symbiont free 186b host calculated as selection  
628 rate, the shaded area denotes  $\pm$  SE. The left-hand panel shows data measured at the start  
629 of the evolution experiment and the right-hand panel shows data measured at the end.  
630 Symbiont-genotype is denoted by colour. A selection rate above 0 indicates greater fitness  
631 in comparison to the symbiont-free host.

632

633

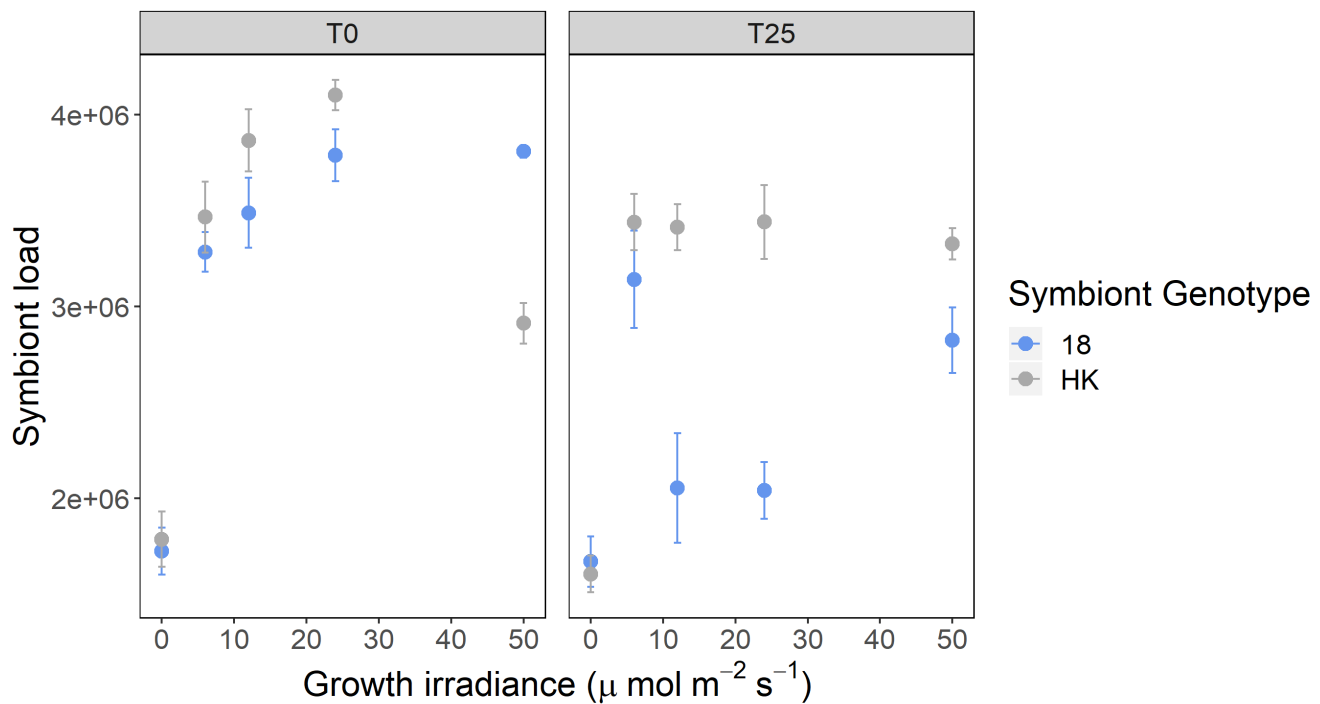

634

635

636

637 **Figure 3. Symbiont load at the start and end of the evolution experiment.**

638 Symbiont load was measured across a light gradient. The left-hand panel shows data

639 measured at the start of the evolution experiment and the right-hand panel shows data

640 measured at the end. The points show the mean ( $n=6$ ) relative chlorophyll fluorescence  $\pm$

641 SE and symbiont genotype is denoted by colour.

642



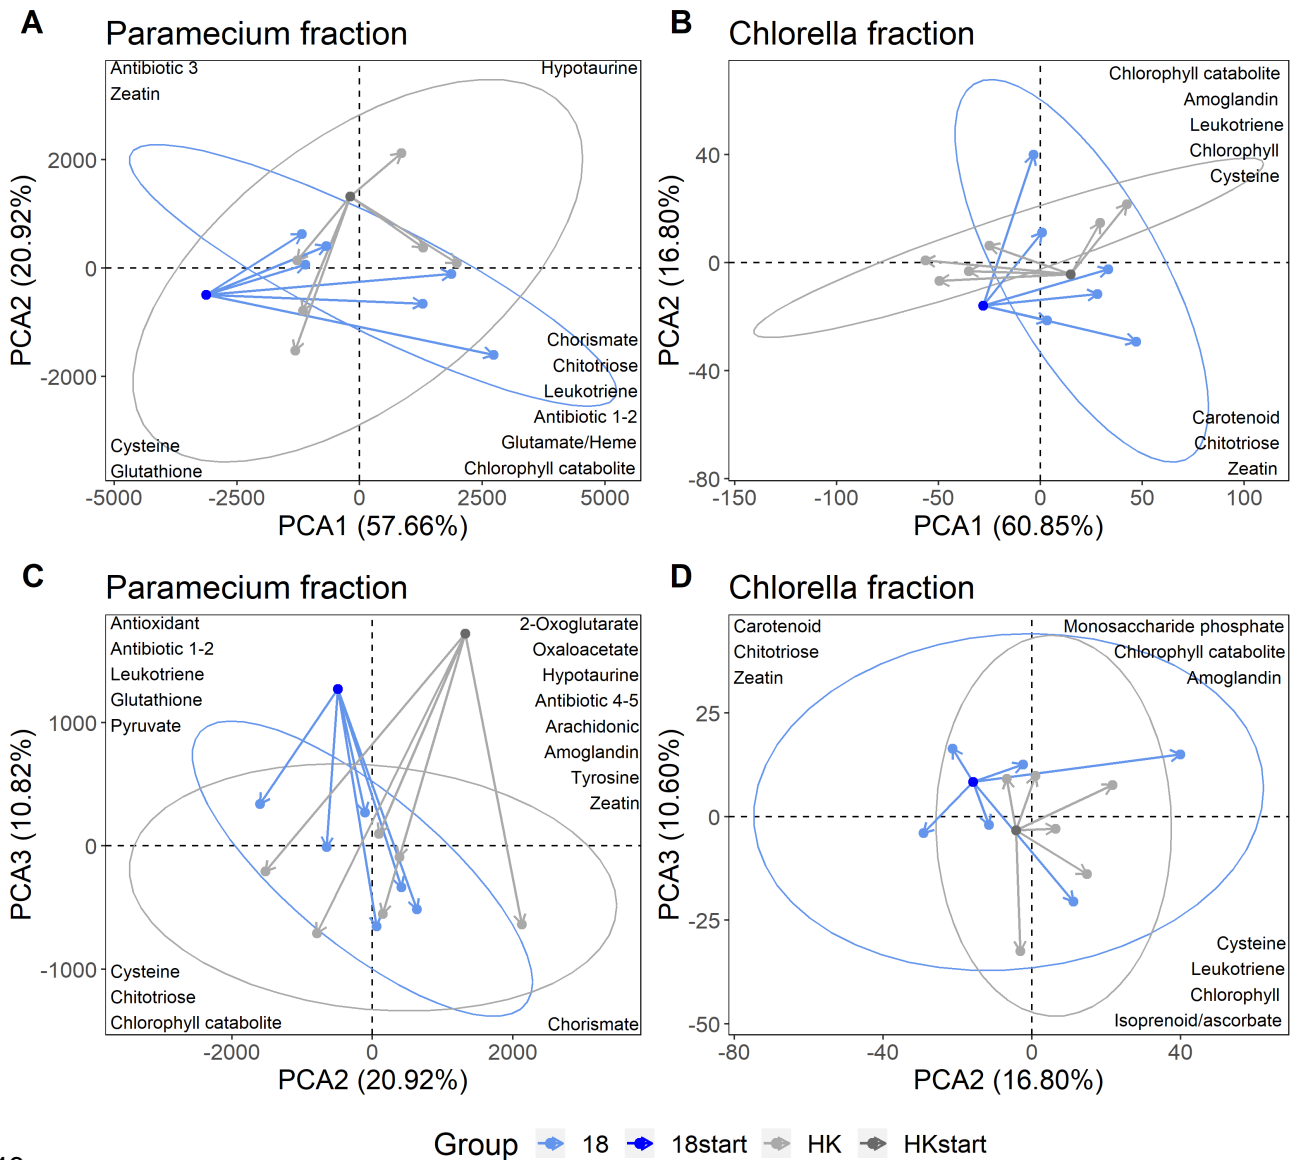

643

644

645 **Figure 4. The trajectories of the metabolic profiles from the start to the end of the**  
 646 **evolution experiment.** These trajectories are shown within PCA plots and the arrows  
 647 represent the movement in principal component space over the course of the experiment,  
 648 with 95% confidence ellipses drawn for the evolved profiles. The metabolite identifications  
 649 for the top loadings are shown in their corresponding location. Colour denotes the symbiont-  
 650 genotype and shade represents whether the samples are from the start or end of the  
 651 experiment. A and C show the results for the *P. bursaria* fraction, B and D the *Chlorella*  
 652 fraction. The top row (A and B) plot PCA 1 versus PCA 2. The bottom row (C and D) plot  
 653 PCA 2 versus PCA 3. The data here presents the biological replicates, which have been  
 654 averaged over their technical replicates.

655
